# Supplementary material for: Key structural factors and intermolecular interactions underlying the formation, functional properties and behaviour in the gastrointestinal tract in vitro of the liposomal form of nutraceuticals coated with whey proteins and chitosan
Source: Royal Society of Chemistry journal article supplement (doi:10.1039/d3fo04285e), 2024-01-01
Supplement: d3fo04285e1.pdf [file d3fo04285e1.pdf]

## Key structural factors and intermolecular interactions underlying the formation, functional properties and behaviour in the gastrointestinal tract *in vitro* of the liposomal form of nutraceuticals coated with whey proteins and chitosan

Maria G. Semenova,\* Anna S. Antipova, Elena I. Martirosova, Nadezhda P. Palmina, Daria V. Zelikina, Sergey A. Chebotarev, Natalya G. Bogdanova, Maria S. Anokhina and Valery V. Kasparov

*N. M. Emanuel Institute of Biochemical Physics of Russian Academy of Sciences, 119334 Moscow, Russian Federation*

Values of refractive index increments ( $dn/dc$ ) required for data processing were measured for the samples using a differential refractometer Shimadzu (Shimadzu, Kyoto, Japan) at  $\lambda = 633$  nm.

**Table S1**

Values of refractive index increments ( $dn/dc$ )

| Sample                                                                                           | $dn/dc \times 10^3$ (m <sup>3</sup> /kg) |
|--------------------------------------------------------------------------------------------------|------------------------------------------|
| before the enzymatic hydrolysis (acetate buffer: 25°C, I=0.001M)                                 |                                          |
| [WPI-(PC-FO-D3-GABA-CEO)] (pH 7.0)                                                               | 0.19 ± 0.01                              |
| [WPI-(PC-FO-D3-GABA-CEO)]-CHIT (pH 5.1)                                                          | 0.17 ± 0.01                              |
| <i>in vitro</i> stomach (SGF, pH 3.0, 37°C, I = 0.128 M)                                         |                                          |
| {[WPI-(PC-FO-D3-GABA-CEO)]-CHIT} <sup>HYDR</sup>                                                 | 0.25 ± 0.02                              |
| <i>in vitro</i> small intestine (SIF, pH 7.0, 37°C, I = 0.266M, 10 mM bile salts): a supernatant |                                          |
| {[WPI-(PC-FO-D3-GABA-CEO)]-CHIT} <sup>HYDR</sup>                                                 | 0.30 ± 0.02                              |
